# Supplementary material
Source: PubMed Central journal article supplement (PMC2669398)
Supplement: 0812624106_0812624106SI.pdf [file 0812624106_0812624106SI.pdf]

# Supporting Information

Sun et al. 10.1073/pnas.0812624106

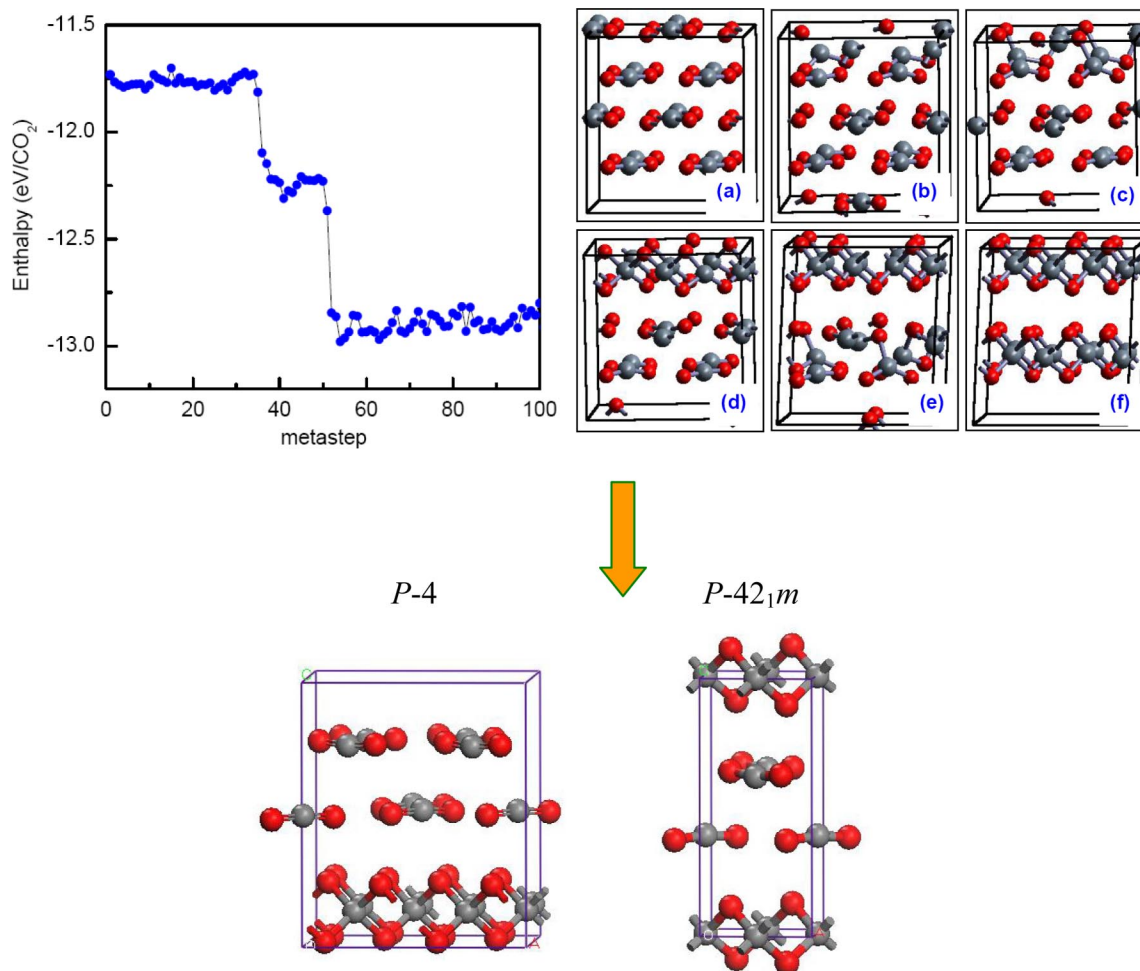

**Fig. S1.** Metadynamics simulation starting from Phase II ( $P4_2/mnm$ ) at 60 GPa and 600 K with a 16 CO<sub>2</sub> molecules supercell. Gaussian parameters are width 20 ( $\text{kbar}\cdot\text{\AA}^3$ )<sup>1/2</sup> and height 400  $\text{kbar}\cdot\text{\AA}^3$ . The enthalpy evolution shows an intermediate state at steps 41–49, the structure of this state is shown in *d*. After optimization, this half polymeric intermediate structure can be fit to *P-4* or *P-42<sub>1</sub>m* space group. The simple one (*P-42<sub>1</sub>m*) is used to calculate the Raman spectra as a representative for the partially polymeric intermediate state between phase II and the final layered phase (*P-4m2*). The intermediate states in experiment with different polymeric concentrations might be more complex than this simple representative structure (*P-42<sub>1</sub>m*).

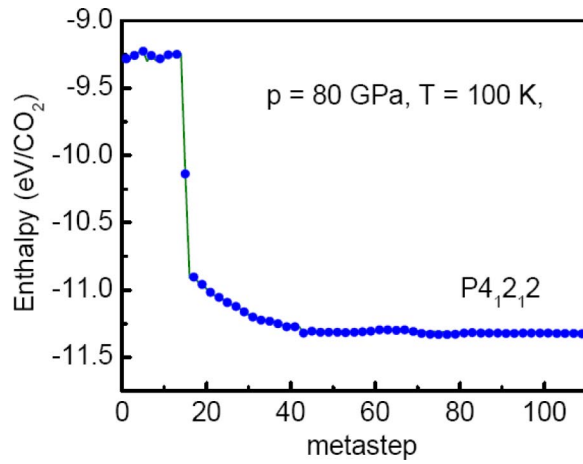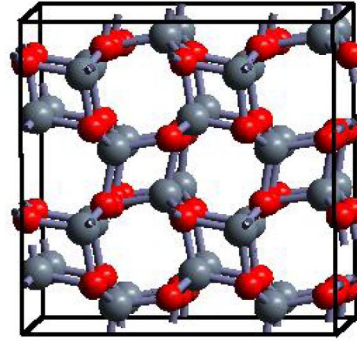

**Fig. S2.** Enthalpy evolution for metadynamics simulation starting from Phase III (*Cmca*) at 80 GPa and 100 K, with 32 CO<sub>2</sub> molecules. Slightly larger Gaussian parameters [width 7 (kbar-Å<sup>3</sup>)<sup>1/2</sup> and height (50 kbar-Å<sup>3</sup>)] are used in this simulation, resulting in a rapid transition. Right inset is the supercell of the final *P4*<sub>1</sub>*2*<sub>1</sub>*2* structure looked along [001] direction.
